# Supplementary material for: A Promising Catalyst for the Dehydrogenation of Perhydro-Dibenzyltoluene: Pt/Al2O3 Prepared by Supercritical CO2 Deposition
Source: MDPI journal article supplement (doi:10.3390/catal12050489), 2022-04-28
Supplement: s1 [file s1]

# A Promising Catalyst for the Dehydrogenation of Perhydro-Dibenzyltoluene: Pt/Al<sub>2</sub>O<sub>3</sub> Prepared by Supercritical CO<sub>2</sub> Deposition

Phillimon Modisha <sup>1,\*</sup>, Rudaviro Garidzirai <sup>1</sup>, Hande Güneş <sup>2</sup>, Selmi Erim Bozbag <sup>2</sup>, Sarshad Rommel <sup>3</sup>, Erdal Uzunlar <sup>4,5</sup>, Mark Aindow <sup>3</sup>, Can Erkey <sup>2,6</sup> and Dmitri Bessarabov <sup>1,\*</sup>

- <sup>1</sup> HySA Infrastructure Centre of Competence, North-West University, Faculty of Engineering, Private Bag X6001, Potchefstroom Campus, 2520 Potchefstroom, South Africa; dmitri.bessarabov@nwu.ac.za (D.B.); 31831435@nwu.ac.za (R.G.)
- <sup>2</sup> Department of Chemical and Biological Engineering, Koç University, Sarıyer, 34450 Istanbul, Turkey; hande.gunesakinciturk@arcelik.com (H.G.); cerkey@ku.edu.tr (C.E.); sbozbag@ku.edu.tr (S.E.B.)
- <sup>3</sup> Department of Materials Science and Engineering, Institute of Material Science, University of Connecticut, Storrs, CT 06269-3136, USA; sarshad.rommel@uconn.edu (S.R.); m.aindow@uconn.edu (M.A.)
- <sup>4</sup> Department of Chemical Engineering, Izmir Institute of Technology, Urla, 35430 Izmir, Turkey; erdaluzunlar@iyte.edu.tr (E.U.)
- <sup>5</sup> Iongenis Electrochemical Technologies, Teknopark Izmir, Urla, 35430 Izmir, Turkey
- <sup>6</sup> Koç University Tüpraş Energy Center (KUTEM), Koç University, Sarıyer, 34450 Istanbul, Turkey
- \* Correspondence: phillimon.modisha@nwu.ac.za (P.M.); dmitri.bessarabov@nwu.ac.za (D.B.); Tel.: +27-18-285-2460 (D.B.)

**Citation:** Modisha, P.; Garidzirai, R.; Güneş, H.; Bozbag, S.E.; Rommel, S.; Aindow, M.; Erkey, C.; Bessarabov, D. A Promising Catalyst for the Dehydrogenation of Perhydro-Dibenzyltoluene: Pt/Al<sub>2</sub>O<sub>3</sub> Prepared by Supercritical CO<sub>2</sub> Deposition. *Catalysts* **2022**, *12*, 489. <https://doi.org/10.3390/catal12050489>

Academic Editors: Vincenzo Vaiano and Olga Sacco

Received: 4 April 2022

Accepted: 26 April 2022

Published: 28 April 2022

**Publisher's Note:** MDPI stays neutral with regard to jurisdictional claims in published maps and institutional affiliations.

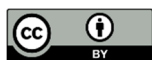

**Copyright:** © 2022 by the authors. Licensee MDPI, Basel, Switzerland. This article is an open access article distributed under the terms and conditions of the Creative Commons Attribution (CC BY) license (<https://creativecommons.org/licenses/by/4.0/>).

**Abstract:** Pt/Al<sub>2</sub>O<sub>3</sub> catalysts prepared via supercritical deposition (SCD), with supercritical CO<sub>2</sub>, wet impregnation (WI) methods and a selected benchmark catalyst, were evaluated for the dehydrogenation of perhydro-dibenzyltoluene (H18-DBT) at 300 °C in a batch reactor. After ten dehydrogenation runs, the average performance of the catalyst prepared using SCD was the highest compared to the benchmark and WI-prepared catalysts. The pre-treatment of the catalysts with the product (dibenzyltoluene) indicated that the deactivation observed is mainly due to the adsorbed H0-DBT blocking the active sites for the reactant (H18-DBT). Furthermore, the SCD method afforded a catalyst with a higher dispersion of smaller sized Pt particles, thus improving catalytic performance towards the dehydrogenation of H18-DBT. The particle diameters of the SCD- and WI-prepared catalysts varied in the ranges of 0.6–2.2 nm and 0.8–3.4 nm and had average particle sizes of 1.1 nm and 1.7 nm, respectively. Energy dispersive X-ray spectroscopy analysis of the catalysts after ten dehydrogenation runs revealed the presence of carbon. In this study, improved catalyst performance led to the production of more liquid-based by-products and carbon material compared to catalysts with low catalytic performance.

**Keywords:** supercritical deposition; wet impregnation; supercritical CO<sub>2</sub>; liquid organic hydrogen carriers; dibenzyltoluene; dehydrogenation

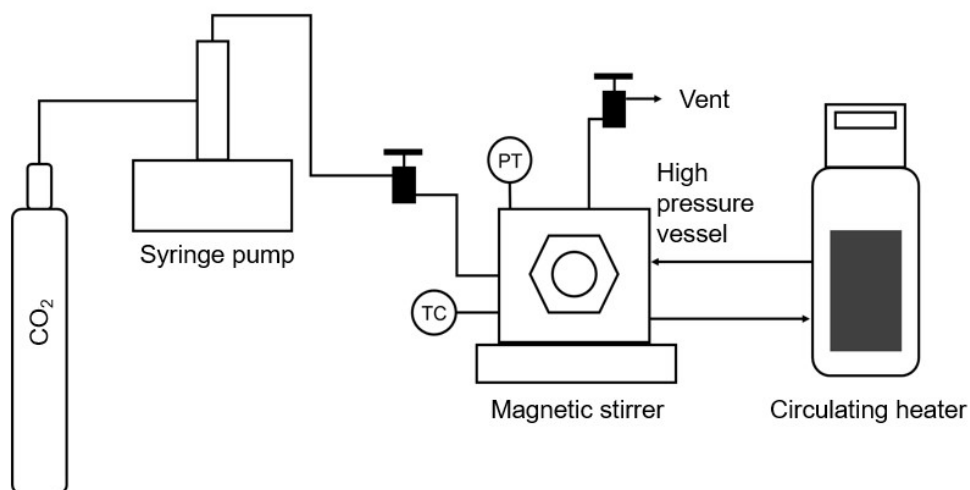

**Figure S1.** Schematic representation of the experimental set-up used for supercritical deposition.

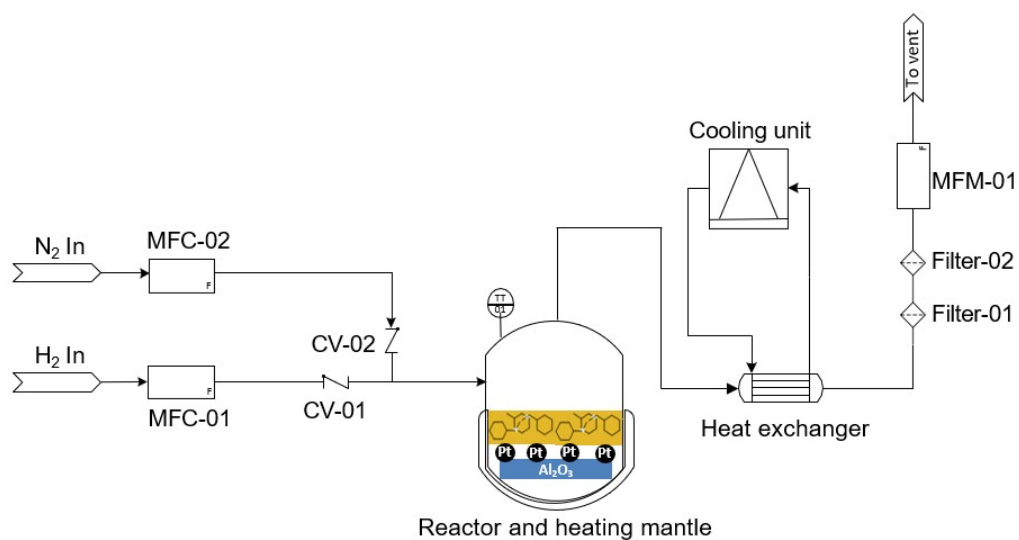

**Figure S2.** Schematic representation of the dehydrogenation set-up.
